# Supplementary material for: A Retrospective Observational Study Using Administrative Databases to Assess the Risk of Spontaneous Abortions Related to Environmental and Socioeconomic Conditions
Source: MDPI journal article supplement (doi:10.3390/life13091853), 2023-09-01
Supplement: s1 [file s1]

## Supplementary material

**Table S1.** Results of the univariate and multivariable General Linear Models applied to estimate the probability of Spontaneous Abortion.

| Parameter                    | Comparison                      | UNIVARIATE |                        | MULTIVARIABLE |                        |
|------------------------------|---------------------------------|------------|------------------------|---------------|------------------------|
|                              |                                 | p-value    | OR[IC95%] <sup>1</sup> | p-value       | OR[IC95%] <sup>1</sup> |
| <b>DI Class</b>              | M vs.. L                        | <0.0001    | 0.64[0.47-0.87]        | <0.0001       | 1.25[0.99-1.59]        |
|                              | M vs. VL                        |            | 0.89[0.65-1.21]        |               | 1[0.79-1.27]           |
|                              | M vs. H                         |            | 0.87[0.65-1.17]        |               | 1.67[1.18-2.34]        |
|                              | L vs. VL                        |            | 1.39[1.15-1.69]        |               | 0.8[0.66-0.96]         |
|                              | L vs. H                         |            | 1.37[1.17-1.61]        |               | 1.33[0.92-1.93]        |
|                              | VL vs. H                        |            | 0.98[0.84-1.16]        |               | 1.66[1.14-2.42]        |
| <b>Age</b>                   | <18 vs. 18-24                   | <0.0001    | 2.48[0.96-6.4]         | <0.0001       | 2.33[0.85-6.37]        |
|                              | <18 vs. 25-29                   |            | 2.14[0.85-5.4]         |               | 1.73[0.64-4.63]        |
|                              | <18 vs. 30-34                   |            | 2.09[0.84-5.25]        |               | 1.5[0.56-4]            |
|                              | <18 vs. 35-39                   |            | 1.24[0.5-3.1]          |               | 0.88[0.33-2.34]        |
|                              | <18 vs. >40                     |            | 0.63[0.25-1.58]        |               | 0.44[0.16-1.17]        |
|                              | 18-24 vs. 25-29                 |            | 0.86[0.62-1.2]         |               | 0.74[0.52-1.06]        |
|                              | 18-24 vs. 30-34                 |            | 0.85[0.62-1.15]        |               | 0.64[0.46-0.9]         |
|                              | 18-24 vs. 35-39                 |            | 0.5[0.37-0.67]         |               | 0.38[0.27-0.53]        |
|                              | 18-24 vs. >40                   |            | 0.25[0.19-0.35]        |               | 0.19[0.13-0.27]        |
|                              | 25-29 vs. 30-34                 |            | 0.98[0.78-1.23]        |               | 0.87[0.68-1.11]        |
|                              | 25-29 vs. 35-39                 |            | 0.58[0.47-0.72]        |               | 0.51[0.4-0.65]         |
|                              | 25-29 vs. >40                   |            | 0.29[0.23-0.37]        |               | 0.25[0.19-0.33]        |
|                              | 30-34 vs. 35-39                 |            | 0.59[0.49-0.71]        |               | 0.59[0.48-0.71]        |
|                              | 30-34 vs. >40                   |            | 0.3[0.24-0.37]         |               | 0.29[0.23-0.36]        |
|                              | 35-39 vs. >40                   |            | 0.51[0.42-0.62]        |               | 0.5[0.4-0.61]          |
| <b>Province of residence</b> | BR vs. TA                       | <0.0001    | 0.78[0.6-1.02]         | <0.0001       | 0.77[0.59-1.02]        |
|                              | BR vs. BAT                      |            | 1.08[0.81-1.45]        |               | 0.99[0.72-1.37]        |
|                              | BR vs. BA                       |            | 1.6[1.24-2.06]         |               | 1.43[1.08-1.89]        |
|                              | BR vs. FG                       |            | 1.44[1.08-1.92]        |               | 1.55[1.13-2.13]        |
|                              | BR vs. LE                       |            | 0.9[0.7-1.17]          |               | 0.96[0.7-1.32]         |
|                              | TA vs. BAT                      |            | 1.38[1.07-1.78]        |               | 1.29[0.97-1.7]         |
|                              | TA vs. BA                       |            | 2.04[1.65-2.52]        |               | 1.85[1.47-2.33]        |
|                              | TA vs. FG                       |            | 1.84[1.44-2.36]        |               | 2.01[1.52-2.64]        |
|                              | TA vs. LE                       |            | 1.15[0.93-1.43]        |               | 1.25[0.95-1.64]        |
|                              | BAT vs. BA                      |            | 1.48[1.16-1.9]         |               | 1.44[1.1-1.89]         |
|                              | BAT vs. FG                      |            | 1.34[1.01-1.77]        |               | 1.56[1.15-2.12]        |
|                              | BAT vs. LE                      |            | 0.84[0.65-1.08]        |               | 0.97[0.69-1.36]        |
|                              | BA vs. FG                       |            | 0.9[0.71-1.15]         |               | 1.08[0.83-1.42]        |
|                              | BA vs. LE                       |            | 0.57[0.46-0.69]        |               | 0.67[0.51-0.9]         |
|                              | FG vs. LE                       |            | 0.63[0.49-0.8]         |               | 0.62[0.45-0.87]        |
| <b>Educational level</b>     | low vs. medium                  | 0.0003     | 1.23[1.06-1.44]        | 0.001         | 1.26[1.07-1.48]        |
|                              | low vs. high                    |            | 1.04[0.88-1.24]        |               | 1.21[1-1.45]           |
|                              | low vs. without                 |            | 0.47[0.19-1.16]        |               | 0.5[0.17-1.48]         |
|                              | medium vs high                  |            | 0.85[0.72-0.99]        |               | 0.96[0.81-1.13]        |
|                              | medium vs. without              |            | 0.39[0.16-0.94]        |               | 0.4[0.13-1.18]         |
|                              | high vs. without                |            | 0.45[0.19-1.11]        |               | 0.41[0.14-1.23]        |
| <b>Marital status</b>        | unmarried vs. married           | <0.0001    | 1.24[1.08-1.42]        | <0.0001       | 1.36[1.17-1.59]        |
|                              | unmarried vs. legally separated |            | 0.46[0.26-0.81]        |               | 0.71[0.39-1.29]        |
|                              | unmarried vs. divorced          |            | 0.75[0.37-1.52]        |               | 1.18[0.57-2.44]        |
|                              | unmarried vs. widow             |            | 0.38[0.07-2.17]        |               | 0.75[0.12-4.64]        |
|                              | married vs. legally separated   |            | 0.37[0.21-0.65]        |               | 0.52[0.29-0.94]        |
|                              | married vs. divorced            |            | 0.6[0.3-1.22]          |               | 0.86[0.42-1.79]        |
|                              | married vs. widow               |            | 0.31[0.05-1.76]        |               | 0.55[0.09-3.4]         |
|                              | legally separated vs. divorced  |            | 1.62[0.66-3.94]        |               | 1.66[0.66-4.16]        |

|                               |                           |         |                  |         |                  |
|-------------------------------|---------------------------|---------|------------------|---------|------------------|
|                               | legaly separeted vs.widow |         | 0.82[0.13-5.1]   |         | 1.05[0.16-7.08]  |
|                               | divorced vs. widow        |         | 0.51[0.08-3.31]  |         | 0.63[0.09-4.49]  |
| <b>Endocrinologic disease</b> | Yes vs. No                | <0.0001 | 0.31[0.21-0.44]  | <0.0001 | 0.28[0.19-0.41]  |
| <b>Genetic disease</b>        | Yes vs. No                | 0.003   | 9.64[2.16-43.12] | 0.0118  | 9.63[1.98-46.86] |

<sup>1</sup>adjusted for multiple comparison with Tukey-Kramer

H (High), DIs lower than -1.331; M (Medium), DIs from -1.331 to -0.78; L (Low), DIs from -0.78 to -0.202; VL (Very Low), DIs higher than -0.202.
